# Supplementary material for: Modeling the global emission, transport and deposition of trace elements associated with mineral dust
Source: Copernicus journal article supplement (doi:10.5194/bg-12-5771-2015), 2015-10-12
Supplement: Supplementary file 1 [file bg-12-5771-2015-supplement.zip]

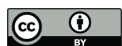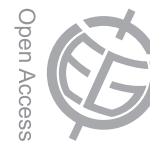

## *Supplement of*

# **Modeling the global emission, transport and deposition of trace elements associated with mineral dust**

**Y. Zhang et al.**

*Correspondence to:* Y. Zhang (yan\_zhang@fudan.edu.cn)

- bg-12-5771-2015-supplement-title-page.pdf
- Supplementary tables and figures updated
  - Capions of supplementary Figures S1-S3.docx
  - Fig S01.pdf
  - Tables S1-S3.docx
  - fig S2.png
  - fig S3.tif
- \_\_MACOSX
  - Supplementary tables and figures updated
    - \* .\_Capions of supplementary Figures S1-S3.docx
    - \* .\_Tables S1-S3.docx
    - \* .\_fig S2.png
    - \* .\_fig S3.tif

The copyright of individual parts of the supplement might differ from the CC-BY 3.0 licence.
