# Supplementary figures and images for: Modeling the global emission, transport and deposition of trace elements associated with mineral dust
Source: Copernicus journal article supplement (doi:10.5194/bg-12-5771-2015), 2015-10-12

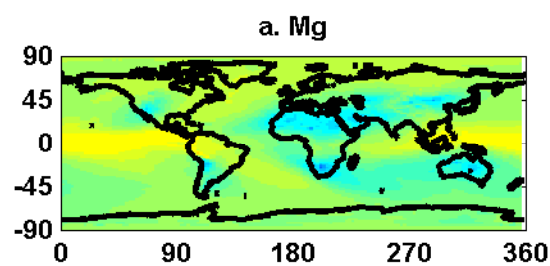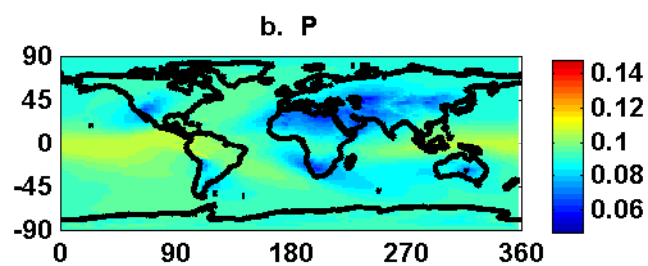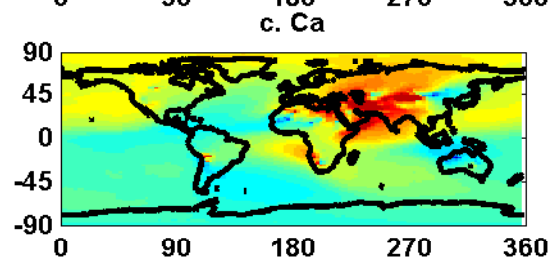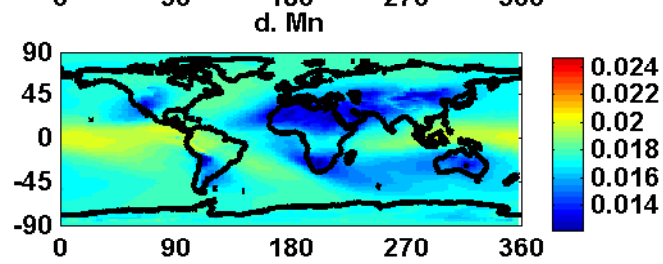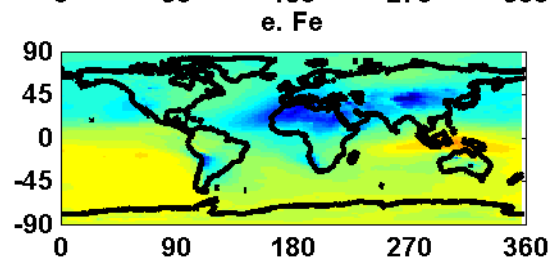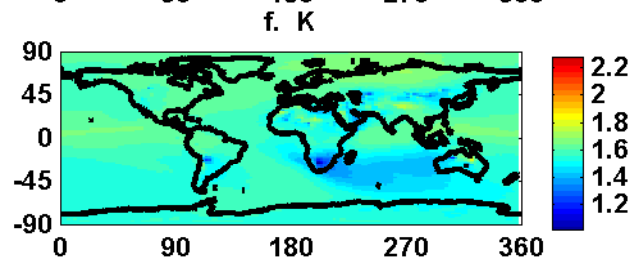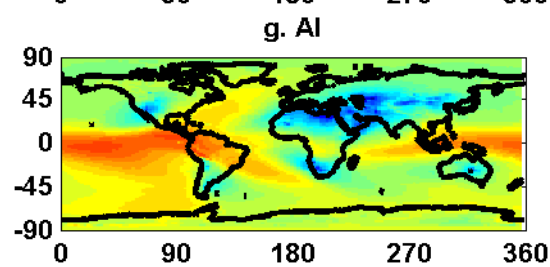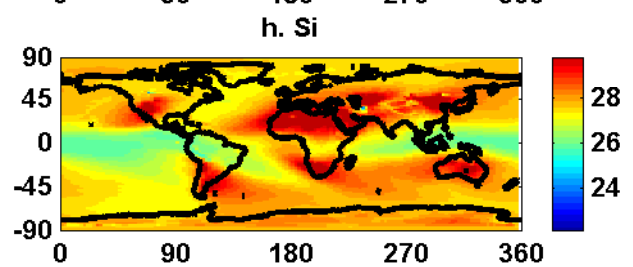

Supplement: Supplementary file 2 [file bg-12-5771-2015-supplement.zip]
